# Supplementary material
Source: PubMed Central journal article supplement (PMC6644457)
Supplement: ao8b00943_si_003.pdf [file ao8b00943_si_003.pdf]

## SUPPORTING INFORMATION

FOR

# Multicomponent mechanochemical synthesis of cyclopentadienyl titanium *tert*-butoxy halides, $\text{Cp}_x\text{TiX}_y(\text{O}^t\text{Bu})_{4-(x+y)}$ ( $x, y = 1, 2; X = \text{Cl}, \text{Br}$ )

*Nicholas C. Boyde, Grant W. Steelman, Timothy P. Hanusa\**

Department of Chemistry, Vanderbilt University, VU Station B #351822, Nashville, Tennessee 37235  
USA

|                                                                                    |    |
|------------------------------------------------------------------------------------|----|
| Figure S1: Diagram of $\text{Cp}_2\text{TiCl}(\text{OEt})$ .....                   | S1 |
| Figure S2: $^1\text{H}$ NMR of $\text{Cp}_2\text{TiBr}(\text{O}^t\text{Bu})$ ..... | S2 |
| Figure S3: $^1\text{H}$ NMR of $\text{CpTiBr}(\text{O}^t\text{Bu})_2$ .....        | S3 |
| Table S1: Crystal Data and Summary of X-ray Data Collection.....                   | S4 |

Figure S1. Diagram of  $\text{Cp}_2\text{TiCl}(\text{OEt})$

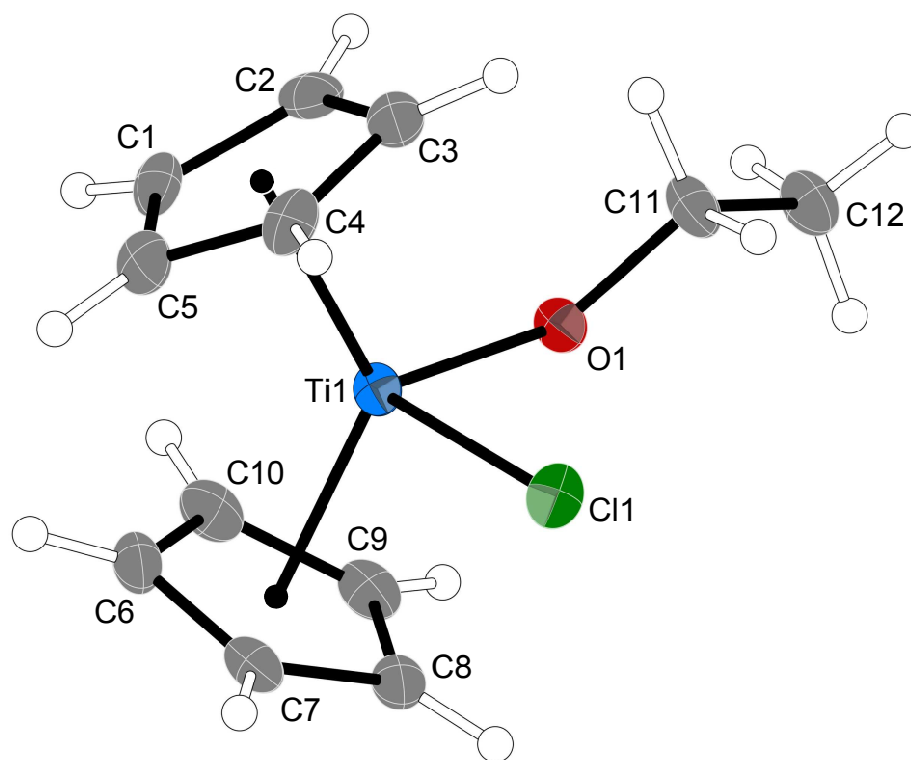

Thermal ellipsoid plot of  $\text{Cp}_2\text{TiCl}(\text{OEt})$ , redetermined at 100 K (50% level); hydrogens have arbitrary radii. Selected bond distances ( $\text{\AA}$ ) and angles (deg): Ti1–O1, 1.858(3); Ti1–Cl1 = 2.4044(12); O1–C11, 1.419(5); Ti–Cp'(ring centroid), 2.085 (ave); O1–Ti1–Cl1, 93.15(10); Ti1–O1–C11, 133.3(2); Cp'–Ti–Cp', 130.3.

**Figure S2:**  $^1\text{H}$  NMR of  $\text{Cp}_2\text{TiBr}(\text{O}^t\text{Bu})$ 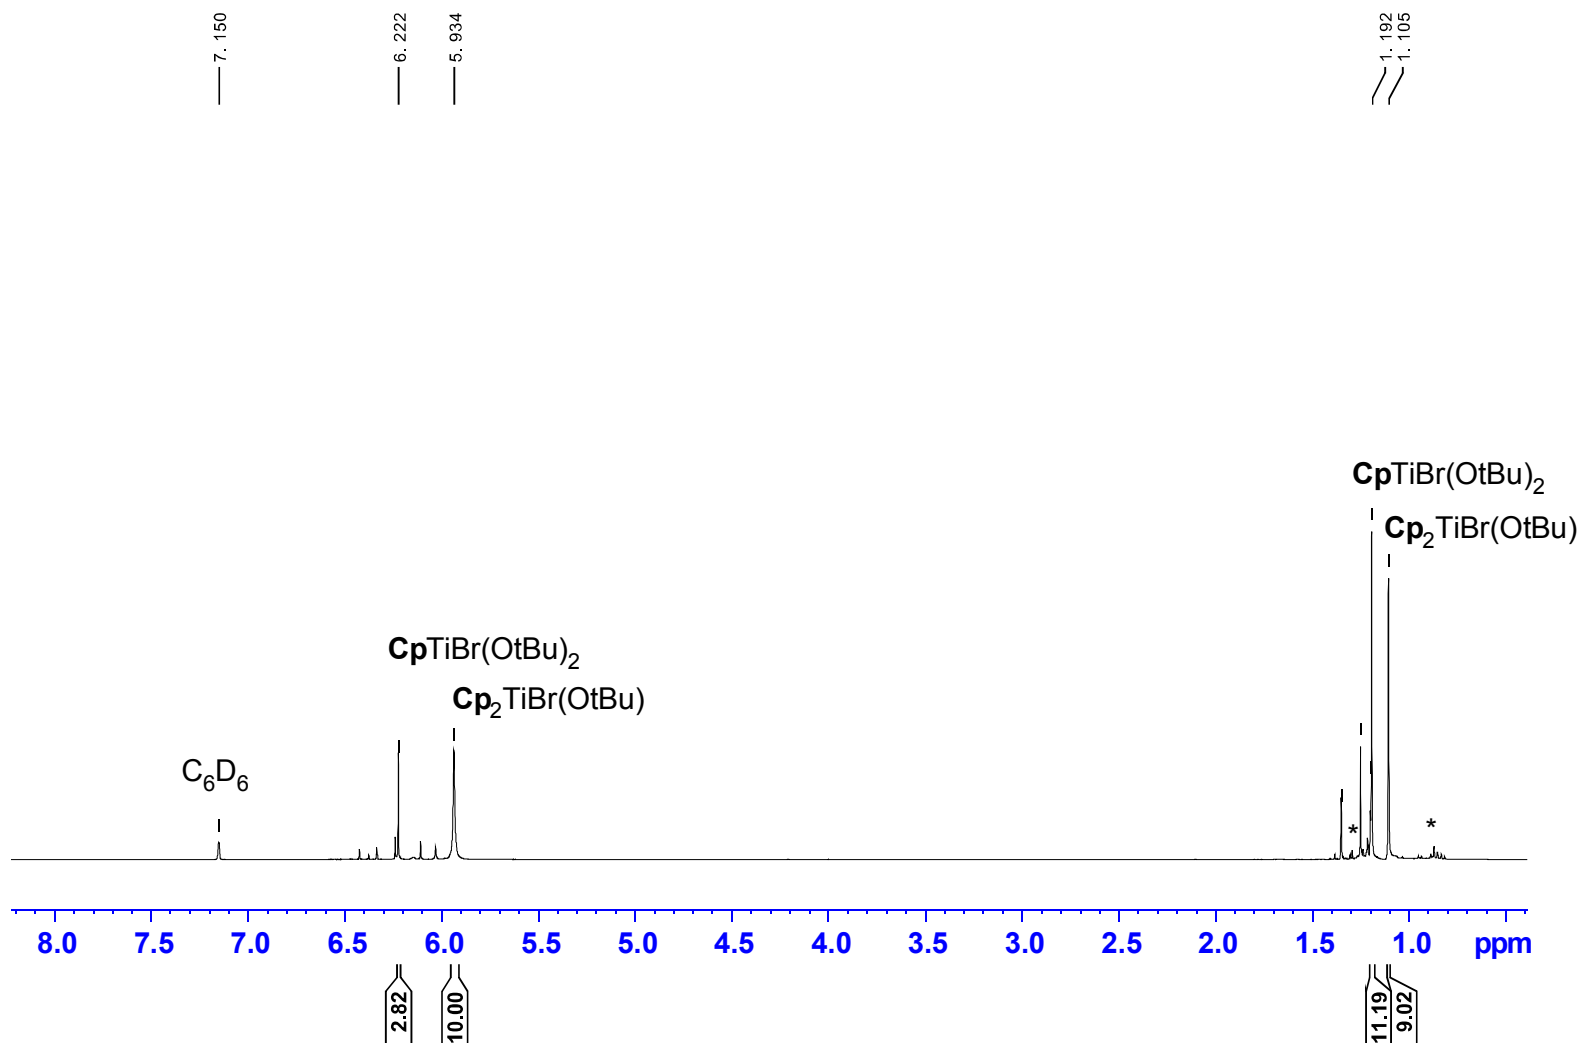

**Figure S3:**  $^1\text{H}$  NMR of  $\text{CpTiBr}(\text{O}^t\text{Bu})_2$ 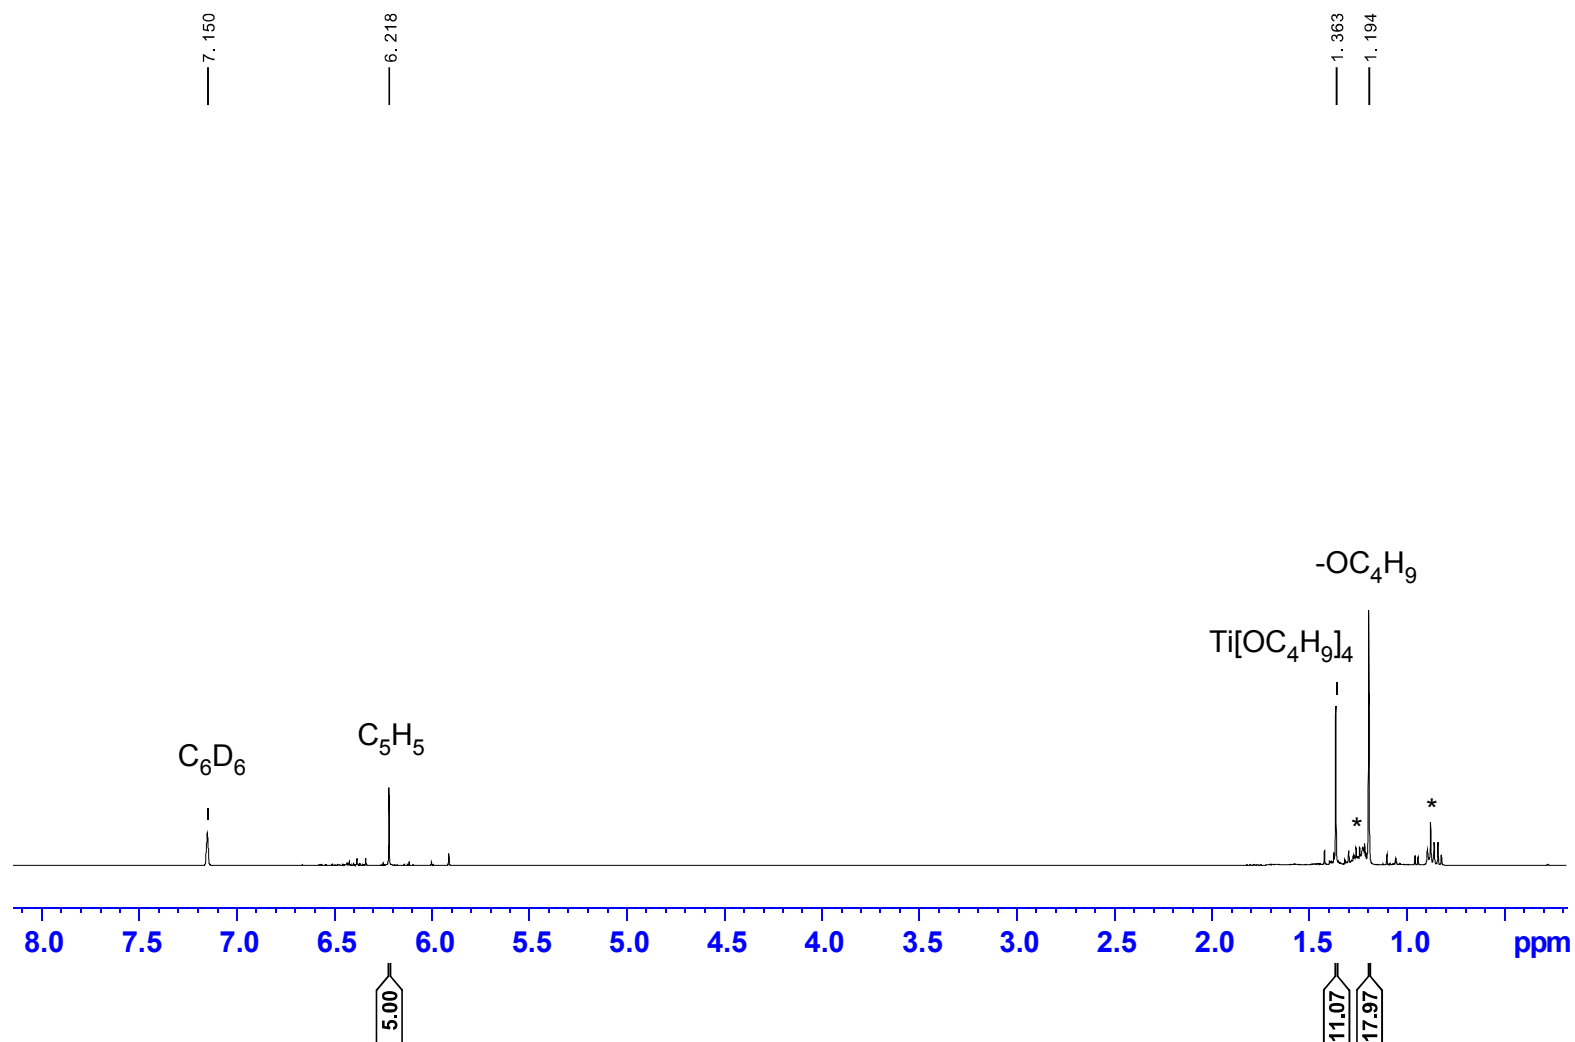

**Table S1.** Crystal Data and Summary of X-ray Data Collection

| Compound                                                     | Cp <sub>2</sub> TiCl(OMe) (1)                                    | Cp <sub>2</sub> TiCl(O <sup>i</sup> Pr) (2)                      | Cp <sub>2</sub> TiCl(O <sup>t</sup> Bu) (3)                      | Cp <sub>2</sub> TiBr(O <sup>t</sup> Bu) (4)                      | CpTiBr <sub>2</sub> (O <sup>t</sup> Bu) (5)                      |
|--------------------------------------------------------------|------------------------------------------------------------------|------------------------------------------------------------------|------------------------------------------------------------------|------------------------------------------------------------------|------------------------------------------------------------------|
| Empirical formula                                            | C <sub>11</sub> H <sub>13</sub> ClOTi                            | C <sub>13</sub> H <sub>17</sub> ClOTi                            | C <sub>14</sub> H <sub>19</sub> ClOTi                            | C <sub>14</sub> H <sub>19</sub> BrOTi                            | C <sub>9</sub> H <sub>14</sub> Br <sub>2</sub> OTi               |
| Formula weight                                               | 244.58                                                           | 272.61                                                           | 286.64                                                           | 331.08                                                           | 345.92                                                           |
| Color of compound                                            | orange                                                           | yellow                                                           | orange                                                           | yellow                                                           | yellow                                                           |
| Temperature/K                                                | 100                                                              | 223                                                              | 100                                                              | 100                                                              | 100                                                              |
| Crystal system                                               | orthorhombic                                                     | orthorhombic                                                     | orthorhombic                                                     | monoclinic                                                       | monoclinic                                                       |
| Space group                                                  | <i>Pbca</i>                                                      | <i>Pnma</i>                                                      | <i>Pbca</i>                                                      | <i>P2<sub>1</sub>/c</i>                                          | <i>P2<sub>1</sub>/c</i>                                          |
| <i>a</i> /Å                                                  | 12.4890(3)                                                       | 13.0890(8)                                                       | 15.01162(13)                                                     | 15.0669(4)                                                       | 12.9173(2)                                                       |
| <i>b</i> /Å                                                  | 11.4556(2)                                                       | 10.6775(6)                                                       | 11.84446(11)                                                     | 12.2725(3)                                                       | 16.12491(19)                                                     |
| <i>c</i> /Å                                                  | 14.6289(3)                                                       | 9.3276(6)                                                        | 15.51368(15)                                                     | 15.5128(4)                                                       | 12.6854(2)                                                       |
| $\alpha$ /°                                                  | 90                                                               | 90                                                               | 90                                                               | 90                                                               | 90                                                               |
| $\beta$ /°                                                   | 90                                                               | 90                                                               | 90                                                               | 90.079(2)                                                        | 111.141(2)                                                       |
| $\gamma$ /°                                                  | 90                                                               | 90                                                               | 90                                                               | 90                                                               | 90                                                               |
| Volume/Å <sup>3</sup>                                        | 2092.94(7)                                                       | 1303.61(14)                                                      | 2758.40(4)                                                       | 2868.44(12)                                                      | 2464.42(7)                                                       |
| Z                                                            | 8                                                                | 4                                                                | 8                                                                | 8                                                                | 8                                                                |
| $\rho_{\text{calc}}$ g/cm <sup>3</sup>                       | 1.555                                                            | 1.389                                                            | 1.380                                                            | 1.380                                                            | 1.865                                                            |
| $\mu$ /mm <sup>-1</sup>                                      | 1.056                                                            | 3.365                                                            | 6.878                                                            | 3.365                                                            | 13.187                                                           |
| F(000)                                                       | 1008                                                             | 1344                                                             | 1200                                                             | 1344                                                             | 1344                                                             |
| Crystal size/mm <sup>3</sup>                                 | 0.45 × 0.28 × 0.11                                               | 0.443 × 0.118 × 0.094                                            | 0.223 × 0.125 × 0.084                                            | 0.37 × 0.27 × 0.19                                               | 0.32 × 0.17 × 0.034                                              |
| Radiation                                                    | MoK $\alpha$ ( $\lambda$ = 0.71073)                              | MoK $\alpha$ ( $\lambda$ = 0.71073)                              | CuK $\alpha$ ( $\lambda$ = 1.54184)                              | MoK $\alpha$ ( $\lambda$ = 0.71073)                              | CuK $\alpha$ ( $\lambda$ = 1.54184)                              |
| 2 $\theta$ range for data collect/°                          | 6.456 to 65.458                                                  | 3.113 to 29.770                                                  | 11.094 to 145.054                                                | 3.762 to 28.415                                                  | 7.338 to 144.476                                                 |
| Index ranges                                                 | -18 ≤ <i>h</i> ≤ 8, -16 ≤ <i>k</i> ≤ 16,<br>-21 ≤ <i>l</i> ≤ 21  | -16 ≤ <i>h</i> ≤ 18, -14 ≤ <i>k</i> ≤ 14,<br>-12 ≤ <i>l</i> ≤ 12 | -18 ≤ <i>h</i> ≤ 18, -14 ≤ <i>k</i> ≤ 14,<br>-18 ≤ <i>l</i> ≤ 19 | -20 ≤ <i>h</i> ≤ 20, -16 ≤ <i>k</i> ≤ 16,<br>-19 ≤ <i>l</i> ≤ 21 | -15 ≤ <i>h</i> ≤ 15, -19 ≤ <i>k</i> ≤ 19,<br>-11 ≤ <i>l</i> ≤ 15 |
| Reflections collected                                        | 17 721                                                           | 8461                                                             | 15 770                                                           | 26 410                                                           | 23 134                                                           |
| Independent reflections                                      | 3612 [R <sub>int</sub> = 0.0271,<br>R <sub>sigma</sub> = 0.0215] | 1808 [R <sub>int</sub> = 0.0863, R <sub>sigma</sub><br>= 0.0486] | 2724 [R <sub>int</sub> = 0.0254, R <sub>sigma</sub><br>= 0.0150] | 6965 [R <sub>int</sub> = 0.0577, R <sub>sigma</sub><br>= 0.0508] | 4810 [R <sub>int</sub> = 0.0450,<br>R <sub>sigma</sub> = 0.0264] |
| Data/restraints/parameters                                   | 3612/1/138                                                       | 1808/156/133                                                     | 2724/0/157                                                       | 6965/25/355                                                      | 4810/0/241                                                       |
| Goodness-of-fit on <i>F</i> <sup>2</sup>                     | 1.054                                                            | 1.112                                                            | 1.050                                                            | 0.993                                                            | 1.083                                                            |
| Final <i>R</i> indexes [ <i>I</i> > 2 $\sigma$ ( <i>I</i> )] | R1 = 0.0319, wR2 =<br>0.0659                                     | R1 = 0.0601, wR2 =<br>0.1394                                     | R1 = 0.0233, wR2 =<br>0.0593                                     | R1 = 0.0485, wR2 =<br>0.1165                                     | R1 = 0.0312, wR2 =<br>0.0812                                     |
| Final <i>R</i> indexes [all data]                            | R1 = 0.0618, wR2 =<br>0.1285                                     | R1 = 0.0713, wR2 =<br>0.1461                                     | R1 = 0.0241, wR2 =<br>0.0599                                     | R1 = 0.0618, wR2 =<br>0.1285                                     | R1 = 0.0322, wR2 =<br>0.0824                                     |
| Largest diff. peak/hole/e Å <sup>-3</sup>                    | 0.45/-0.44                                                       | 0.39/-0.46                                                       | 0.23/-0.30                                                       | 1.18/-0.87                                                       | 1.20/-0.73                                                       |
